# Supplementary material
Source: PubMed Central journal article supplement (PMC3760074)
Supplement: Supp_Fig2.pdf [file Supp_Fig2.pdf]

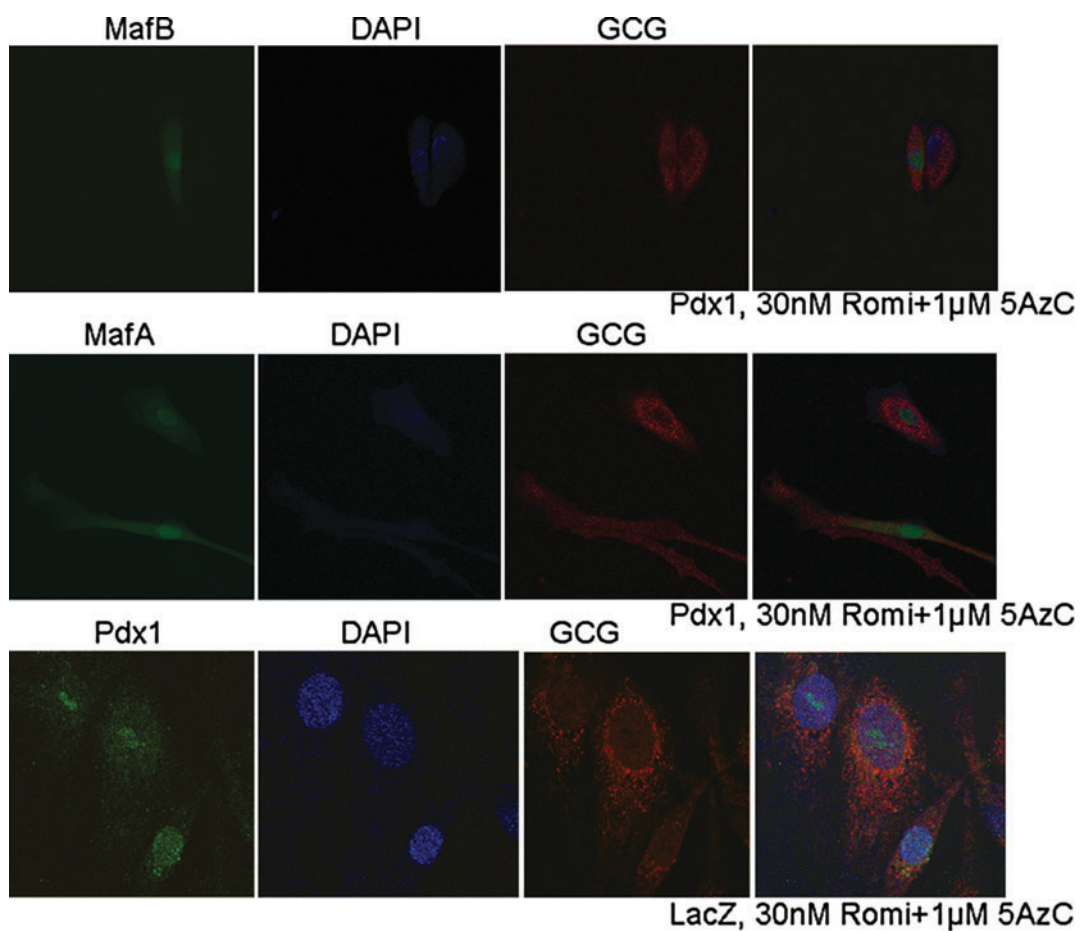

**SUPPLEMENTARY FIG. S2.** Human dermal fibroblasts (hDFs) undergoing the reprogramming protocol express musculoaponeurotic fibrosarcoma oncogene homolog A (MafA), MafB and Pdx1 proteins. hDFs were infected for 72 h with Pdx1 (or LacZ, for Pdx1 immunostaining) adenovirus following by admission of 30 nM Romi 1 µM and 5-AzC for 48 h. Immunostaining was performed on fixed cells.
